# Supplementary material for: Zn-mediated electrochemical allylation of aldehydes in aqueous ammonia
Source: Royal Society of Chemistry journal article supplement (doi:10.1039/b905553c), 2009-01-01

# Zn-mediated electrochemical allylation of aldehydes in aqueous ammonia

Jing-mei Huang,<sup>\*,a,b</sup> Yi Dong<sup>a</sup>

<sup>a</sup> *School of Chemistry and Chemical Engineering, South China University of Technology, Guangzhou, Guangdong, 510640, China*

<sup>b</sup> *Ministry of Education Key Laboratory for the Synthesis and Application of Organic Functional Molecules, Hubei University, Wuhan, 430062, China*

[chehjm@scut.edu.cn](mailto:chehjm@scut.edu.cn)

## Supplementary Information

### **Table of contents**

|                                                                                                                                                 |     |
|-------------------------------------------------------------------------------------------------------------------------------------------------|-----|
| General methods.....                                                                                                                            | S2  |
| Experimental procedure.....                                                                                                                     | S2  |
| Spectroscopic data of products.....                                                                                                             | S3  |
| Procedure of electrodeposition.....                                                                                                             | S6  |
| Cyclic voltammograms of Zn <sup>2+</sup> in different solutions in the absence of organic reactants .....                                       | S6  |
| Cyclic voltammograms of Zn <sup>2+</sup> in 4.5 M aqueous ammonia solution in the presence of organic reactants.....                            | S7  |
| SEM image of Zn particles deposited from 4.5 M aqueous ammonia solution and 0.1 N H <sub>2</sub> SO <sub>4</sub> solution.....                  | S8  |
| X-ray diffraction spectrum of Zn particles deposited from 4.5 M aqueous ammonia solution and 0.1 N H <sub>2</sub> SO <sub>4</sub> solution..... | S9  |
| Copies of NMR spectra of products.....                                                                                                          | S11 |

## **General methods**

Commercial solvents and reagents were used without further purification with the following exceptions: benzaldehyde, furan-2-carbaldehyde, cinnamaldehyde and 3-phenylpropanal were distilled before use, and secondary distilled water was used for the reaction.

Crotyl bromide was purchased from Aldrich; heptanal and cyclohexanecarbaldehyde was purchased from Alfa, 3-methylbenzaldehyde, picolinaldehyde, cinnamaldehyde, 3-phenylpropanal and allyl bromide were products from Alfa; furan-2-carbaldehyde, 4-methoxybenzaldehyde, 2-hydroxybenzaldehyde, 4-chlorobenzaldehyde and 2-oxoacetic acid were purchased from Aladian Corporation in China; zinc foils (98%) were purchased from domestic corporation.

Analytical thin layer chromatography (TLC) plates and the silica gel for column chromatography were phased from Qingdao Haiyang Chemical and Special Silica Gel Co, Ltd.

Proton nuclear magnetic resonance ( $^1\text{H}$  NMR) and carbon nuclear magnetic resonance ( $^{13}\text{C}$  NMR) spectroscopy were performed on Bruker Advance 300 and 500 NMR spectrometers. Chemical shifts of  $^1\text{H}$  NMR spectra are reported as in units of parts per million (ppm) downfield from  $\text{SiMe}_4$  ( $\delta$  0.0) and relative to the signal of chloroform-*d* ( $J = 7.264$ , singlet). Multiplicities were given as: s (singlet); br s (broad singlet); d (doublet); t (triplet); q (quartet); dd (doublet of doublets); m (multiplets), etc. The number of protons (n) for a given resonance is indicated by nH. Carbon nuclear magnetic resonance spectra ( $^{13}\text{C}$  NMR) are reported as in units of parts per million (ppm) downfield from  $\text{SiMe}_4$  ( $\delta$  0.0) and relative to the signal of chloroform-*d* ( $J = 77.03$ , triplet).

Cyclic voltmmetry (CV) analysis was performed on Auto Lab<sup>®</sup> PGSTAT30 (product from Metrohm AG, Switzerland).

SEM image was performed on SE-30 EXEM.

X-ray diffraction (XRD) data were collected on a PANalytical (Netherlands) X'Pert PRO X-ray diffractometer.

## **Experimental procedure**

**General procedure for the allylation of benzaldehyde:** A mixture of benzaldehyde (0.5 mmol), allyl bromide (1.0 mmol) in aqueous ammonia (4.5 M, 5 mL, diluted from 1.5 mL of 25% (w/w) ammonia with water) was stirred in a round-bottom flask cell equipped with a pair of zinc electrodes ( $1.5\text{ cm}^2$ ) at room temperature. The suspension was electrolyzed at a constant current (15 mA) until benzaldehyde was completely consumed ( $2\text{ F mol}^{-1}$  of current was consumed, 1.5-2 hrs). The reaction mixture was quenched by 3 M HCl, and then extracted with diethyl ether ( $2 \times 10\text{ mL}$ ). The combined organic layer was washed with water (5 mL), brine (5 mL) and then dried over anhydrous magnesium sulfate. The organic solvent was removed on a rotary evaporator under vacuum. The residue was purified by column chromatography on silica gel (petroleum ether/ethyl acetate 7:1) and the corresponding homoallylic alcohol was obtained as a colourless liquid (**3a**, 68 mg, 92%). The totally consumed Zn on the electrodes was 43 mg, 0.66 mmol. The authenticities of the products are verified by comparing their  $^1\text{H}$  NMR and  $^{13}\text{C}$  NMR spectral with reported data.

## Spectroscopic data of products

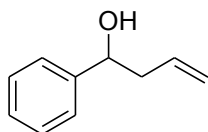

1-phenylbut-3-en-1-ol

**3a** (68 mg, 92%) colourless oil  $\delta_{\text{H}}$  (500 MHz;  $\text{CDCl}_3$ ;  $\text{Me}_4\text{Si}$ ) 2.16 (1 H, br s,  $\text{CHOH}$ ), 2.47-2.56 (2 H, m,  $2 \times \text{CH}_2\text{CH}=\text{CH}_2$ ), 4.73 (1 H, dd,  $J$  5.4 and 7.6 Hz,  $\text{CHOH}$ ), 5.13-5.19 (2 H, m,  $2 \times \text{CH}_2\text{CH}=\text{CH}_2$ ), 5.77-5.86 (1 H, m,  $\text{CH}_2\text{CH}=\text{CH}_2$ ), 7.26-7.36 (5 H, m,  $5 \times \text{Ph}$ );  $\delta_{\text{C}}$  (500 MHz;  $\text{CDCl}_3$ ;  $\text{Me}_4\text{Si}$ ) 43.7, 73.2, 118.2, 125.7, 127.4, 128.3, 134.4, 143.8.

Reference: Yamamoto, Y.; Yatagi, H.; Maruyama, K. *J. Am. Chem. Soc.* **1981**, *103*, 1969.

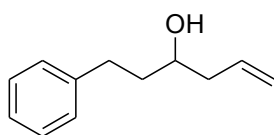

1-phenylhex-5-en-3-ol

**3b** (71 mg, 70%) colourless oil  $\delta_{\text{H}}$  (300 MHz;  $\text{CDCl}_3$ ;  $\text{Me}_4\text{Si}$ ) 1.77-1.81 (2 H, m,  $2 \times \text{PhCH}_2\text{CH}_2$ ), 2.16-2.22 (1 H, m,  $\text{CH}_2\text{CH}=\text{CH}_2$ ), 2.30-2.35 (1 H, m,  $\text{CH}_2\text{CH}=\text{CH}_2$ ), 2.66-2.84 (2 H, m,  $2 \times \text{PhCH}_2\text{CH}_2$ ), 3.67-3.69 (1 H, m,  $\text{CHOH}$ ), 5.13-5.16 (2 H, m,  $2 \times \text{CH}_2\text{CH}=\text{CH}_2$ ), 5.79-5.85 (1 H, m,  $\text{CH}_2\text{CH}=\text{CH}_2$ ), 7.09-7.30 (5 H, m,  $5 \times \text{Ph}$ ).  $\delta_{\text{C}}$  (300 MHz;  $\text{CDCl}_3$ ;  $\text{Me}_4\text{Si}$ ) 32.0, 38.4, 42.0, 69.9, 118.3, 125.8, 128.3, 128.4, 134.6, 142.0.

Reference: Schmidt, B. *J. Org. Chem.* **2004**, *69*, 7772.

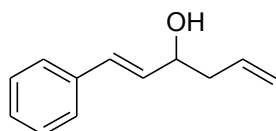

(*E*)-1-phenylhexa-1,5-dien-3-ol

**3c** (61 mg, 70%) colourless oil  $\delta_{\text{H}}$  (300 MHz;  $\text{CDCl}_3$ ;  $\text{Me}_4\text{Si}$ ) 2.28-2.43 (2 H, m,  $2 \times \text{CH}_2\text{CH}=\text{CH}_2$ ), 4.30 (1 H, dd,  $J$  6.0 and 12.3 Hz,  $\text{CHOH}$ ), 5.09-5.14 (2 H, m,  $2 \times \text{CH}_2\text{CH}=\text{CH}_2$ ), 5.73-5.84 (1 H, m,  $\text{CH}_2\text{CH}=\text{CH}_2$ ), 6.18 (1 H, dd,  $J$  6.3 and 16.0 Hz,  $\text{CH}=\text{CH}$ ), 6.54 (1 H, d,  $J$  16.0 Hz,  $\text{CH}=\text{CH}$ ), 7.13-7.46 (5 H, m,  $5 \times \text{Ph}$ );  $\delta_{\text{C}}$  (300 MHz;  $\text{CDCl}_3$ ;  $\text{Me}_4\text{Si}$ ) 42.0, 71.7, 118.5, 126.5, 127.7, 128.6, 130.3, 131.5, 134.0, 136.6.

Reference: Kobayashi, S.; Nagayama, S. *J. Org. Chem.* **1996**, *61*, 2256.

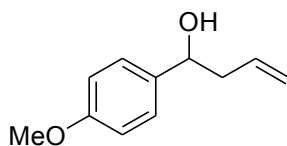

1-(4-methoxyphenyl)but-3-en-1-ol

**3d** (76 mg, 85%) colourless oil  $\delta_{\text{H}}$  (500 MHz;  $\text{CDCl}_3$ ;  $\text{Me}_4\text{Si}$ ) 1.94 (1 H, br s,  $\text{CHOH}$ ), 2.41-2.44 (2 H, m,  $2 \times \text{CH}_2\text{CH}=\text{CH}_2$ ), 3.72 (3 H, s,  $3 \times \text{OCH}_3$ ), 4.61 (1 H, t,  $J$  6.3 Hz,  $\text{CHOH}$ ), 5.04-5.09 (2 H, m,  $2 \times \text{CH}_2\text{CH}=\text{CH}_2$ ), 5.68-5.76 (1 H, m,  $\text{CH}_2\text{CH}=\text{CH}_2$ ), 6.80-7.21 (4 H, m,  $4 \times \text{Ph}$ );  $\delta_{\text{C}}$  (500 MHz;  $\text{CDCl}_3$ ;

Me<sub>4</sub>Si) 42.8, 54.3, 72.1, 112.9, 117.2, 126.1, 133.7, 135.2, 158.1.

Reference: Dam, J. H.; Fristrup, P.; Madsen, R. *J. Org. Chem.* **2008**, *73*, 3228.

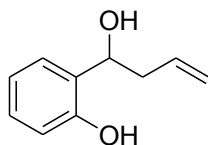

2-(1-hydroxybut-3-enyl)phenol

**3e** (59 mg, 85%) colourless oil  $\delta_{\text{H}}$  (500 MHz; CDCl<sub>3</sub>; Me<sub>4</sub>Si) 2.48-2.59 (2 H, m, 2 × CH<sub>2</sub>CH=CH<sub>2</sub>), 2.94 (1 H, br s, CHOH), 4.79 (1 H, dd, *J* 5.0 and 8.2 Hz, CHOH), 5.12-5.15 (2 H, m, 2 × CH<sub>2</sub>CH=CH<sub>2</sub>), 5.72-5.81 (1 H, m, CH<sub>2</sub>CH=CH<sub>2</sub>), 6.75-7.11 (4 H, m, 4 × Ph);  $\delta_{\text{C}}$  (500 MHz; CDCl<sub>3</sub>; Me<sub>4</sub>Si) 42.0, 74.5, 117.1, 119.1, 119.7, 126.4, 127.0, 128.8, 133.8, 155.3.

Reference: Zhang, T.; Shi, M.; Zhao, M. *Tetrahedron* **2008**, *64*, 2412.

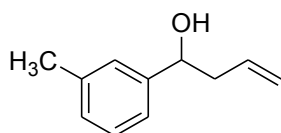

1-*m*-tolylbut-3-en-1-ol

**3f** (67 mg, 82%) colourless oil  $\delta_{\text{H}}$  (500 MHz; CDCl<sub>3</sub>; Me<sub>4</sub>Si) 2.11 (1 H, br s, CHOH), 2.31 (3 H, s, CH<sub>3</sub>), 2.40-2.48 (2 H, m, 2 × CH<sub>2</sub>CH=CH<sub>2</sub>), 4.63 (1 H, dd, *J* 5.4 and 7.3 Hz, CHOH), 5.07-5.13 (2 H, m, 2 × CH<sub>2</sub>CH=CH<sub>2</sub>), 5.71-5.79 (1 H, m, CH<sub>2</sub>CH=CH<sub>2</sub>), 7.02-7.20 (4 H, m, 4 × Ph);  $\delta_{\text{C}}$  (500 MHz; CDCl<sub>3</sub>; Me<sub>4</sub>Si) 21.4, 43.7, 73.3, 118.1, 122.8, 126.4, 128.1, 128.2, 134.5, 137.9, 143.8.

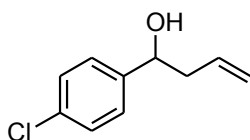

1-(4-chlorophenyl)but-3-en-1-ol

**3g** (64 mg, 70%) colourless oil  $\delta_{\text{H}}$  (500 MHz; CDCl<sub>3</sub>; Me<sub>4</sub>Si) 2.35-2.45 (2 H, m, 2 × CH<sub>2</sub>CH=CH<sub>2</sub>), 4.63 (1 H, dd, *J* 5.0 and 7.6 Hz, CHOH), 5.06-5.10 (2 H, m, 2 × CH<sub>2</sub>CH=CH<sub>2</sub>), 5.66-5.74 (1 H, m, CH<sub>2</sub>CH=CH<sub>2</sub>), 7.19-7.25 (4 H, m, 4 × Ph);  $\delta_{\text{C}}$  (500 MHz; CDCl<sub>3</sub>; Me<sub>4</sub>Si) 43.7, 72.5, 118.6, 127.1, 128.4, 133.1, 133.9, 142.2.

Reference: Makoto, W.; Hidenori, O.; Kinya, A. *Bull. Chem. Soc. Jpn.* **1990**, *63*, 1738.

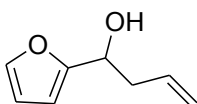

1-(furan-2-yl)but-3-en-1-ol

**3h** (58 mg, 84%) colourless oil  $\delta_{\text{H}}$  (500 MHz; CDCl<sub>3</sub>; Me<sub>4</sub>Si) 2.52-2.58 (2 H, m, 2 × CH<sub>2</sub>CH=CH<sub>2</sub>), 4.68 (1 H, t, *J* 6.3 Hz, CHOH), 5.06-5.13 (2 H, m, 2 × CH<sub>2</sub>CH=CH<sub>2</sub>), 5.69-5.78 (1 H, m, CH<sub>2</sub>CH=CH<sub>2</sub>), 6.18 (1 H, d, *J* 3.1 Hz, furyl), 6.26 (1 H, dd, *J* 1.9 and 3.1 Hz, furyl), 7.30-7.31 (1 H, m, furyl);  $\delta_{\text{C}}$  (300 MHz; CDCl<sub>3</sub>; Me<sub>4</sub>Si) 40.0, 66.9, 106.1, 110.1, 118.5, 133.7, 142.0, 156.0.

Reference: Wang, Z.; Zha, Z.; Zhou, C. *Org. Lett.* **2002**, *4*, 1683.

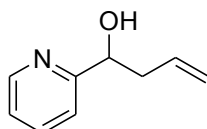

1-(pyridin-2-yl)but-3-en-1-ol

**3i** (46 mg, 84%) yellow oil  $\delta_{\text{H}}$  (300 MHz;  $\text{CDCl}_3$ ;  $\text{Me}_4\text{Si}$ ) 2.40-2.54 (1 H, m,  $\text{CH}_2\text{CH}=\text{CH}_2$ ), 2.55-2.67 (1 H, m,  $\text{CH}_2\text{CH}=\text{CH}_2$ ), 4.74-4.80 (1 H, m,  $\text{CHOH}$ ), 5.06-5.15 (2 H, m,  $2 \times \text{CH}_2\text{CH}=\text{CH}_2$ ), 5.74-5.91 (1 H, m,  $\text{CH}_2\text{CH}=\text{CH}_2$ ), 7.15-7.22 (1 H, m, *pyridyl*), 7.26-7.32 (1 H, m, *pyridyl*), 7.63-7.71 (1 H, m, *pyridyl*), 8.52-8.53 (1 H, m, *pyridyl*);  $\delta_{\text{C}}$  (300 MHz;  $\text{CDCl}_3$ ;  $\text{Me}_4\text{Si}$ ) 42.9, 72.2, 118.0, 120.4, 122.3, 134.1, 136.6, 148.2, 161.3.

Reference: Kobayashi, S.; Nagayama, S. *J. Org. Chem.* **1996**, *61*, 2256.

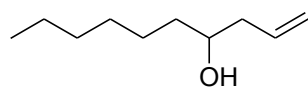

dec-1-en-4-ol

**3j** (39 mg, 50%) colourless oil  $\delta_{\text{H}}$  (300 MHz;  $\text{CDCl}_3$ ;  $\text{Me}_4\text{Si}$ ) 0.87 (3 H, m,  $\text{CH}_3$ ), 1.15-1.50 (10 H, m,  $10 \times \text{CH}_2$ ), 2.05-2.18 (1 H, m,  $\text{CH}_2\text{CH}=\text{CH}_2$ ), 2.23-2.39 (1 H, m,  $\text{CH}_2\text{CH}=\text{CH}_2$ ), 3.61 (1 H, m,  $\text{CHOH}$ ), 5.06-5.18 (2 H, m,  $2 \times \text{CH}_2\text{CH}=\text{CH}_2$ ), 5.74-5.92 (1 H, m,  $\text{CH}_2\text{CH}=\text{CH}_2$ ).

Reference: Jiang, S.; Agoston, G. E.; Chen, T.; Cabal, M-P. and Turos, E. *Organometallics*, **1995**, *14*, 4697.

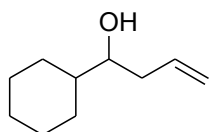

1-cyclohexylbut-3-en-1-ol

**3k** (41 mg, 53%) colourless oil  $\delta_{\text{H}}$  (500 MHz;  $\text{CDCl}_3$ ;  $\text{Me}_4\text{Si}$ ) 0.91-1.32 (4 H, m,  $4 \times \text{cyclohexyl}$ ), 1.56-1.82 (7 H, m,  $7 \times \text{cyclohexyl}$ ), 2.03-2.10 (1 H, m,  $\text{CH}_2\text{CH}=\text{CH}_2$ ), 2.23-2.30 (1 H, m,  $\text{CH}_2\text{CH}=\text{CH}_2$ ), 3.30-3.35 (1 H, m,  $\text{CHOH}$ ), 5.06-5.10 (2 H, m,  $2 \times \text{CH}_2\text{CH}=\text{CH}_2$ ), 5.72-5.82 (1 H, m,  $\text{CH}_2\text{CH}=\text{CH}_2$ )

Reference: Li, G.-L. and Zhao, G. *Org. Lett.* **2006**, *8*, 633.

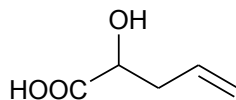

2-hydroxypent-4-enoic acid

**3l** (28 mg, 48%) colourless oil  $\delta_{\text{H}}$  (300 MHz;  $\text{CDCl}_3$ ;  $\text{Me}_4\text{Si}$ ) 2.40-2.47 (1 H, m,  $\text{CH}_2\text{CH}=\text{CH}_2$ ), 2.54-2.62 (1 H, m,  $\text{CH}_2\text{CH}=\text{CH}_2$ ), 4.28 (1 H, dd,  $J$  4.4 and 6.6 Hz,  $\text{CHOH}$ ), 5.11-5.16 (2 H, m,  $2 \times \text{CH}_2\text{CH}=\text{CH}_2$ ), 5.72-5.81 (1 H, m,  $\text{CH}_2\text{CH}=\text{CH}_2$ ).  $\delta_{\text{C}}$  (300 MHz;  $\text{CDCl}_3$ ;  $\text{Me}_4\text{Si}$ ) 38.3, 69.8, 119.3, 132.1, 178.3.

Reference: Kaur, P.; Singh, P.; Kumar, S. *Tetrahedron* **2005**, *61*, 8231.

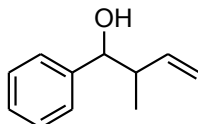

2-methyl-1-phenylbut-3-en-1-ol

**3m** (76 mg, 94%) colourless oil  $\delta_{\text{H}}$  (300 MHz;  $\text{CDCl}_3$ ;  $\text{Me}_4\text{Si}$ ) (*syn* isomer) 0.99 (3 H, d,  $J$  6.8 Hz,  $\text{CH}_3$ ), 2.41-2.60 (1 H, m,  $\text{CHCH}_3$ ), 4.59 (1 H, d,  $J$  5.5 Hz,  $\text{CHOH}$ ), 4.98-5.07 (2 H, m,  $2 \times \text{CH}_2\text{CH}=\text{CH}_2$ ), 5.66-5.86 (1 H, m,  $\text{CH}_2\text{CH}=\text{CH}_2$ ), 7.20-7.37 (5 H, m,  $5 \times \text{Ph}$ ). (*anti* isomer)  $\delta$  0.85 (3 H, d,  $J$  6.8 Hz,  $\text{CH}_3$ ), 2.41-2.60 (1 H, m,  $\text{CHCH}_3$ ), 4.34 (1 H, d,  $J$  7.8 Hz,  $\text{CHOH}$ ), 5.12-5.22 (2 H, m,  $2 \times \text{CH}_2\text{CH}=\text{CH}_2$ ), 5.66-5.86 (1 H, m,  $\text{CH}_2\text{CH}=\text{CH}_2$ ), 7.20-7.37 (5 H, m,  $5 \times \text{Ph}$ ).  $\delta_{\text{C}}$  (300 MHz;  $\text{CDCl}_3$ ;  $\text{Me}_4\text{Si}$ ) (*syn* isomer) 14.0, 44.6, 77.2, 115.6, 126.5, 127.3, 128.0, 140.3, 142.5;  $\delta_{\text{C}}$  (*anti* isomer) 16.5, 46.3, 77.8, 116.9, 126.8, 127.6, 128.2, 140.6, 142.4.

Reference: Wang, Z.; Zha, Z.; Zhou, C. *Org. Lett.* **2002**, *4*, 1683.

### procedure of electrodeposition

**General Electrodeposition procedure:** 0.1 M  $\text{LiClO}_4$  solution (or 0.1 M NaOH, 0.1 N  $\text{H}_2\text{SO}_4$  and 4.5 M aqueous ammonia) was electrolyzed at constant current of 15 mA in a round-bottom flask cell equipped with a pair of zinc electrodes ( $1.5 \text{ cm}^2$ ) at room temperature for 2 hrs. The Zn powder deposited on the cathode was collected, washed and weighted.

### Cyclic voltammograms of $\text{Zn}^{2+}$ in different solutions in the absence of reactants

The electrochemistry of Zn deposition from 0.1 N  $\text{H}_2\text{SO}_4$ , 0.1 M  $\text{LiClO}_4$ , 0.1 M NaOH and 4.5 M aqueous ammonia solutions was investigated by cyclic voltmetry (CV) with the same concentration of zinc (II) salt (Figure 2). The available experimental data did not allow full understanding of the deposition mechanism. However, curves of zinc deposition recorded in different solutions exhibited different reduction potentials. As we can see from the following Figure, deposition in 4.5 M aqueous ammonia solution started from - 0.1 V, which was the one who deposited easiest, compared that with 0.1 N  $\text{H}_2\text{SO}_4$  (-0.3V), 0.1 M  $\text{LiClO}_4$  (-1.1V) and 0.1 M NaOH (-1.5V).

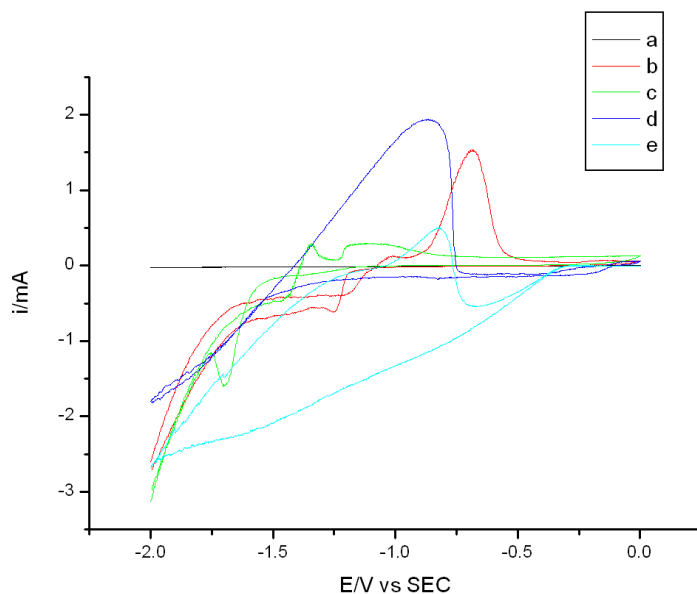

Cyclic voltammograms of the solutions recorded at a scan rate of  $50 \text{ mV s}^{-1}$  at rt with two platinum electrodes ( $12 \text{ mm}^2$ ). (a)  $\text{H}_2\text{O}$  only. (b)  $13 \text{ mM ZnCl}_2$ ,  $0.1 \text{ N LiClO}_4$ . (c)  $13 \text{ mM ZnCl}_2$ ,  $0.1 \text{ N NaOH}$ . (d)  $13 \text{ mM ZnCl}_2$ ,  $4.5 \text{ M}$  aqueous ammonia solution. (e)  $13 \text{ mM ZnCl}_2$ ,  $0.1 \text{ N H}_2\text{SO}_4$  (a minimal scale represent  $5 \text{ mA}$  on Y axis for curve e)

### Cyclic voltammograms of $\text{Zn}^{2+}$ in $4.5 \text{ M}$ aqueous ammonia solution in the presence of organic reactants

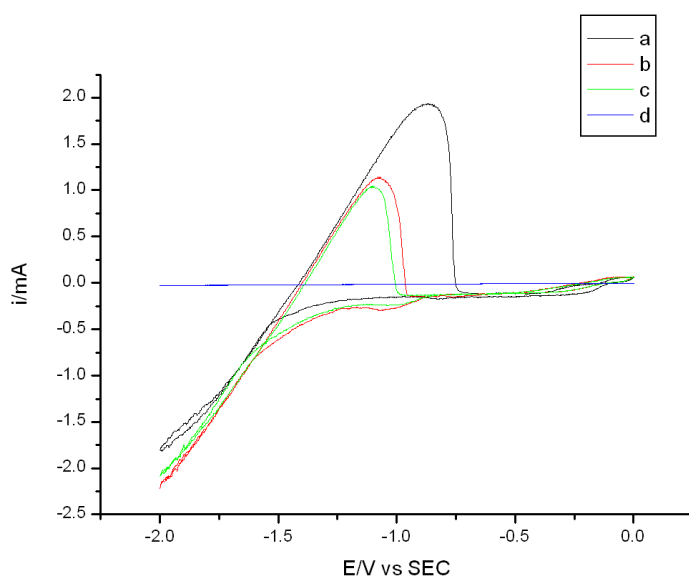

Cyclic voltammograms of the solution recorded at a scan rate of  $50 \text{ mV s}^{-1}$  and room temperature with two platinum electrodes ( $12 \text{ mm}^2$ ). (a)  $13 \text{ mM ZnCl}_2$ ,  $4.5 \text{ M}$  aqueous ammonia solution. (b)  $13 \text{ mM ZnCl}_2$ ,  $20 \text{ mM}$  allyl bromide,  $4.5 \text{ M}$  aqueous ammonia solution. (c)  $13 \text{ mM ZnCl}_2$ ,  $10 \text{ mM}$  benzaldehyde,  $20 \text{ mM}$  allyl bromide,  $4.5 \text{ M}$  aqueous ammonia solution. (d)  $\text{H}_2\text{O}$  only.

**SEM image of Zn particles deposited from 4.5 M aqueous ammonia solution and 0.1 N H<sub>2</sub>SO<sub>4</sub> solution**

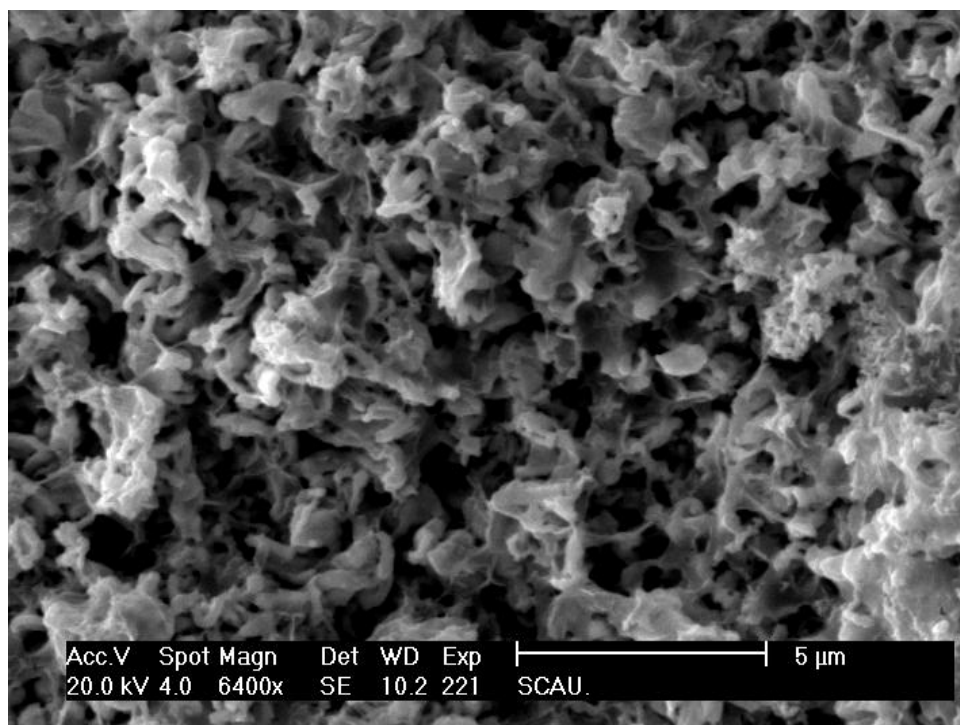

SEM image of Zn particles deposited from 4.5 M aqueous ammonia solution

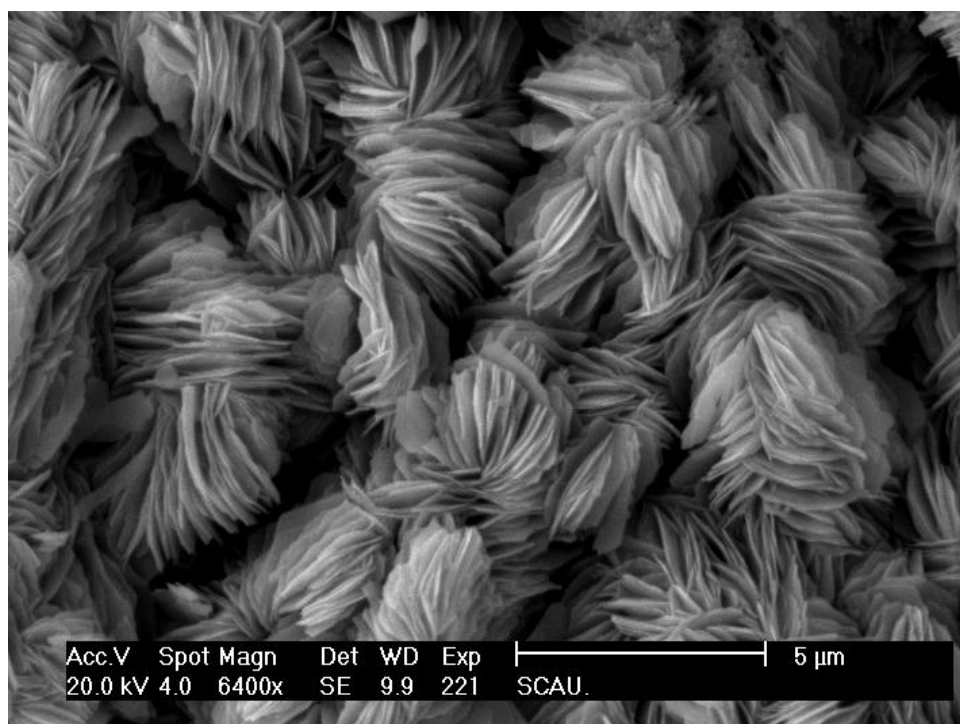

SEM image of Zn particles deposited from 0.1 N H<sub>2</sub>SO<sub>4</sub> solution



**X-ray diffraction spectrum of Zn particles prepared in 4.5M aqueous ammonia solution and 0.1 N H<sub>2</sub>SO<sub>4</sub> solution**

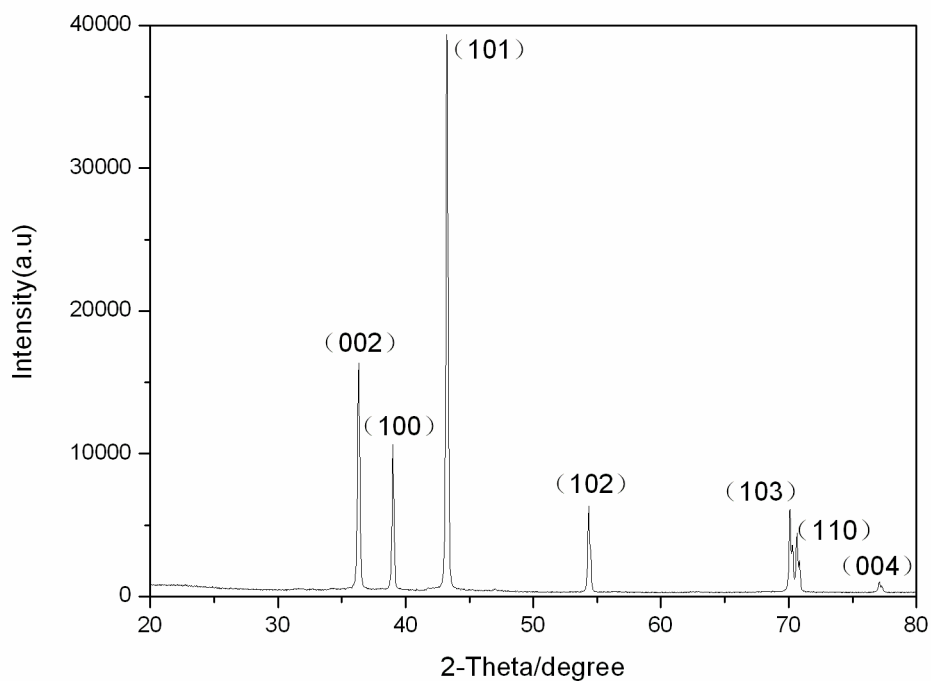

X-ray diffraction spectrum of deposits from 4.5 M aqueous ammonia solution

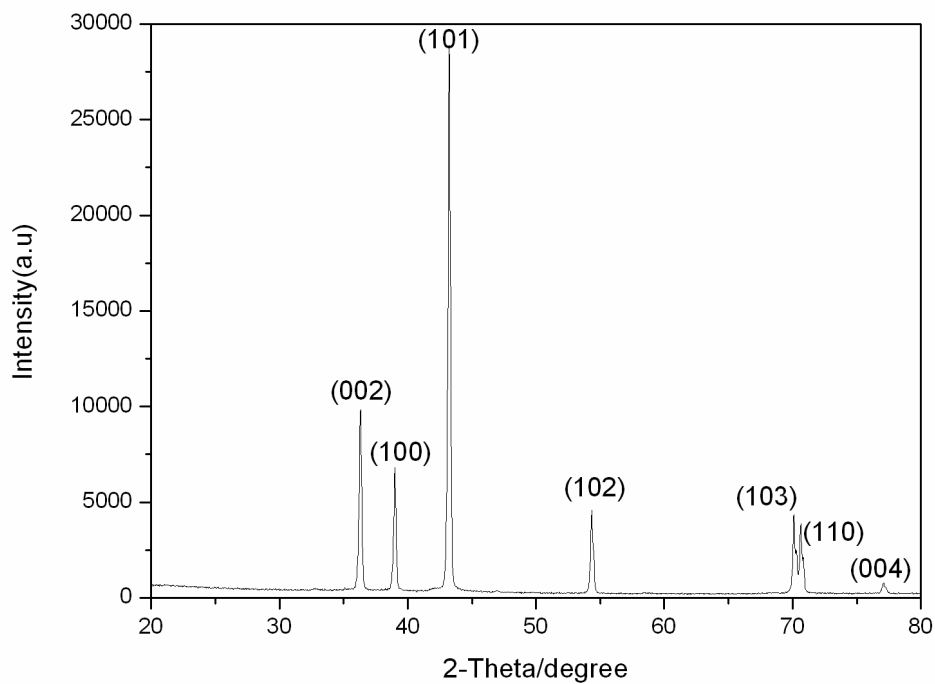

X-ray diffraction spectrum of Zn particles deposited from 0.1 N H<sub>2</sub>SO<sub>4</sub> solution

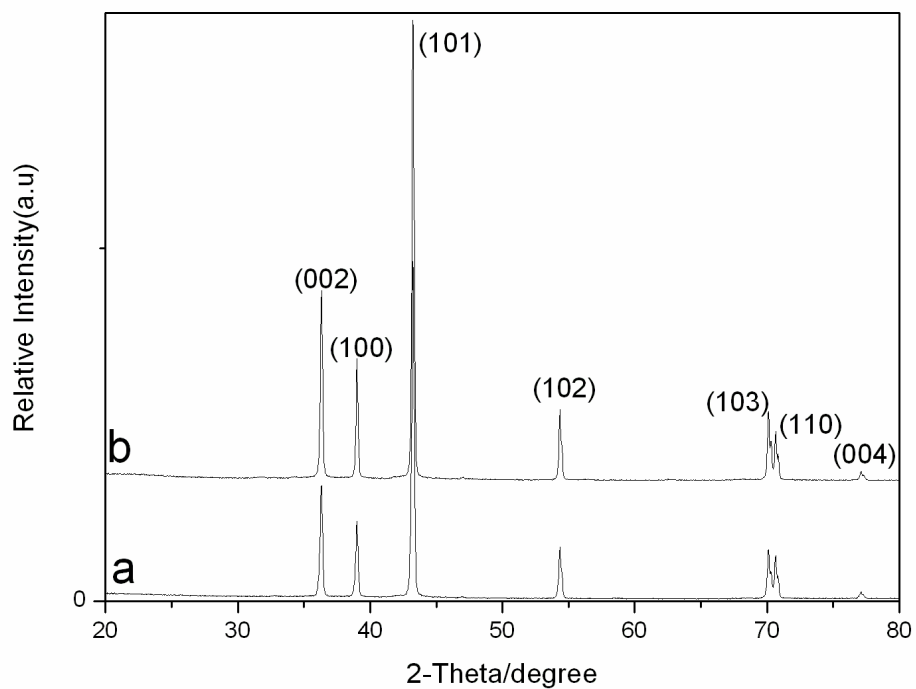

Comparison of X-ray diffraction spectrum of deposits from 4.5 M aqueous ammonia solution and 0.1 N  $\text{H}_2\text{SO}_4$  solution  
(a) from 4.5 M aqueous ammonia solution  
(b) from 0.1 N  $\text{H}_2\text{SO}_4$  solution

**Copies of NMR spectrum for products**

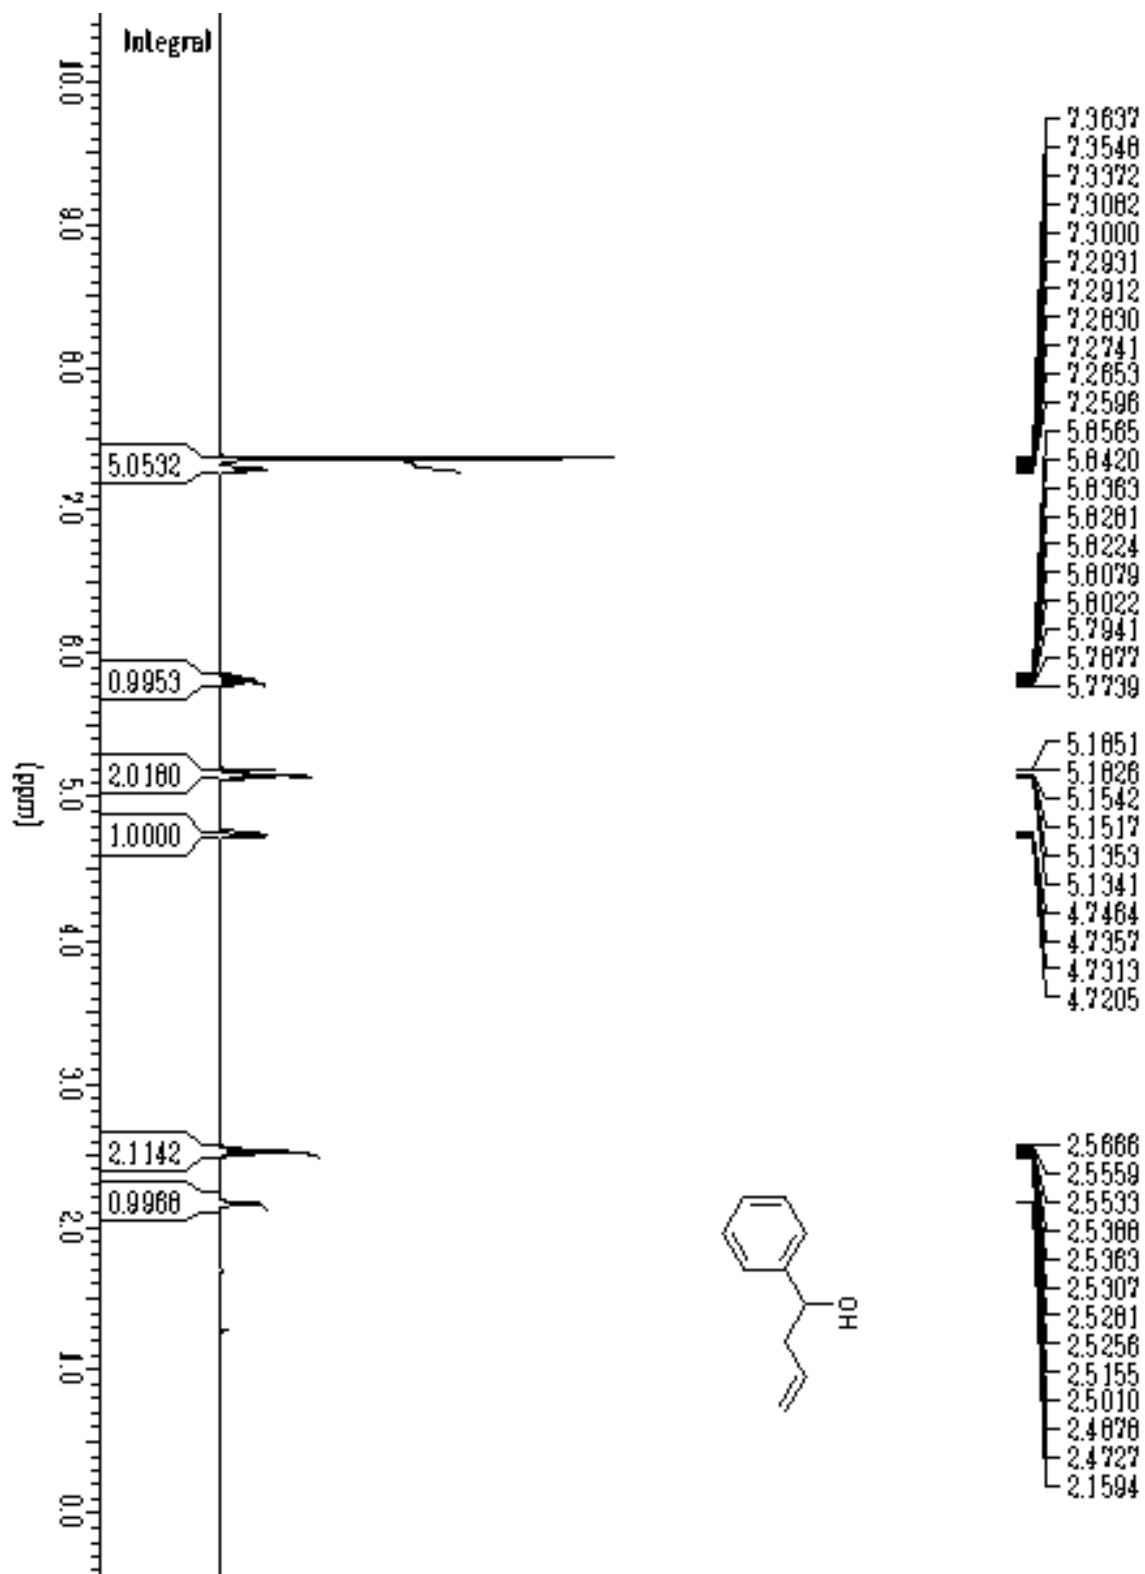

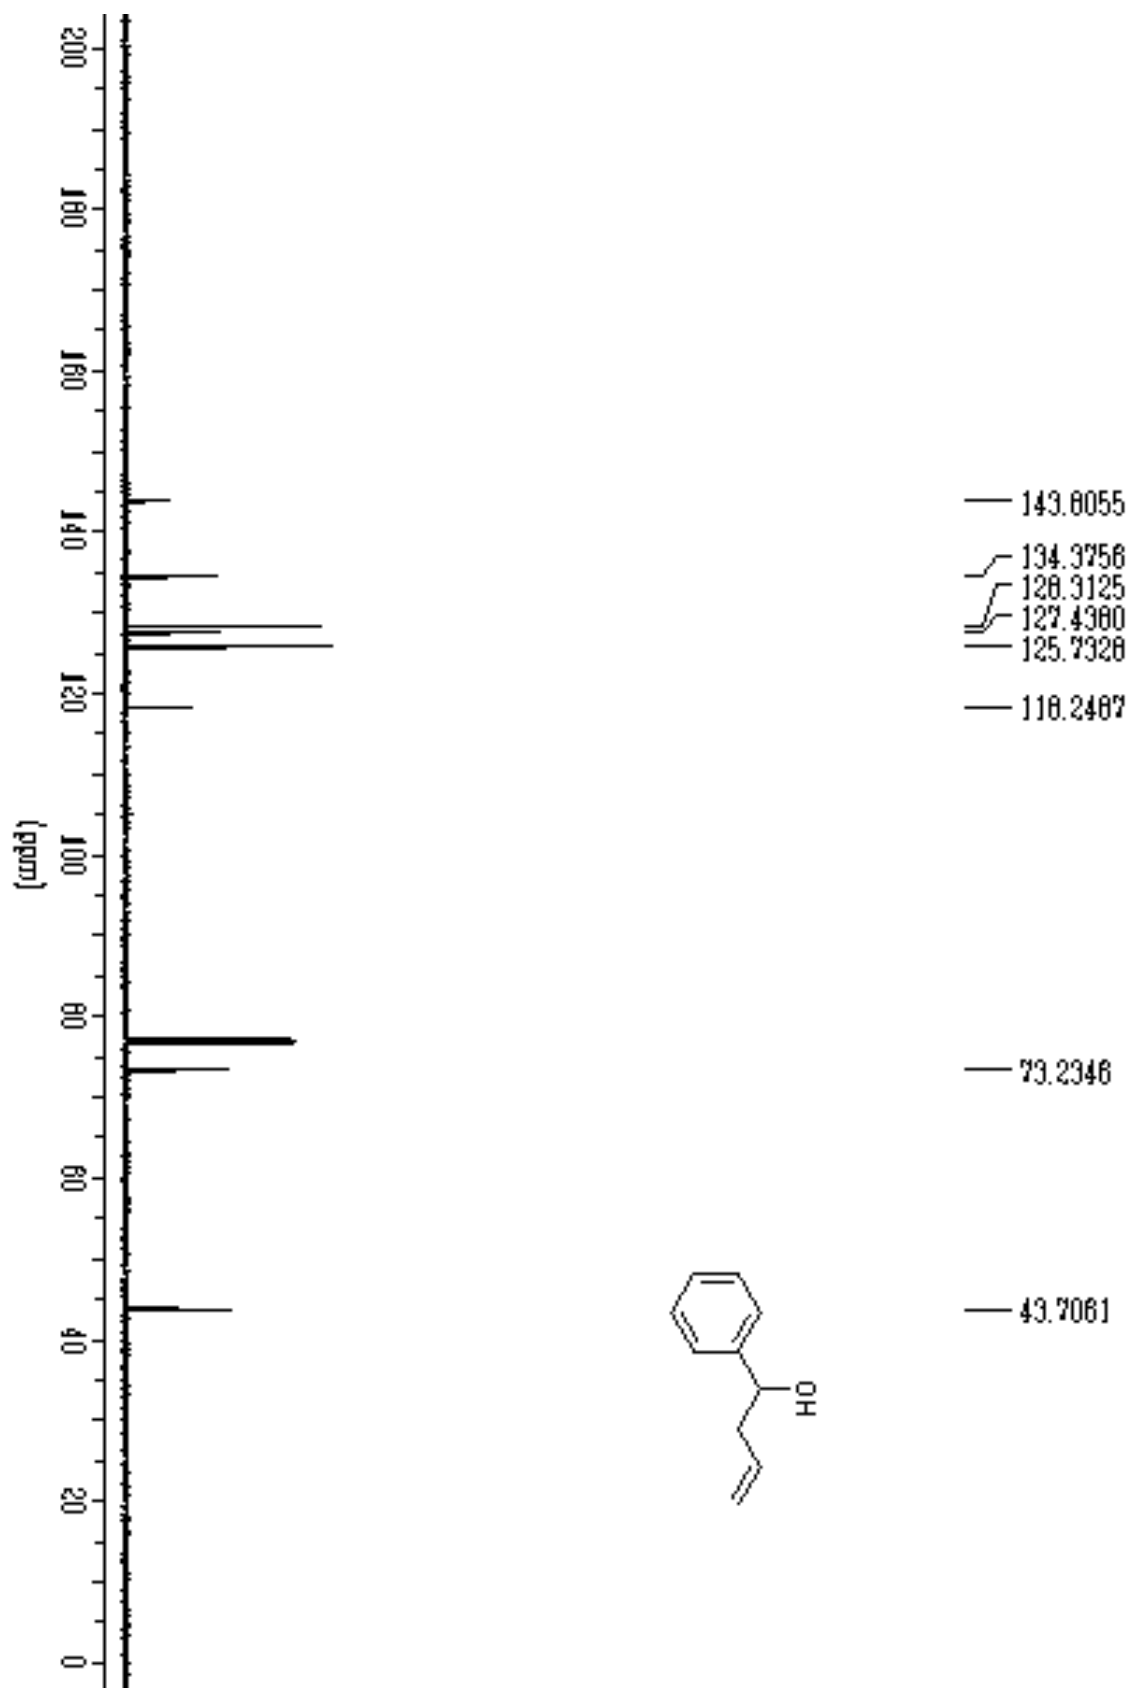

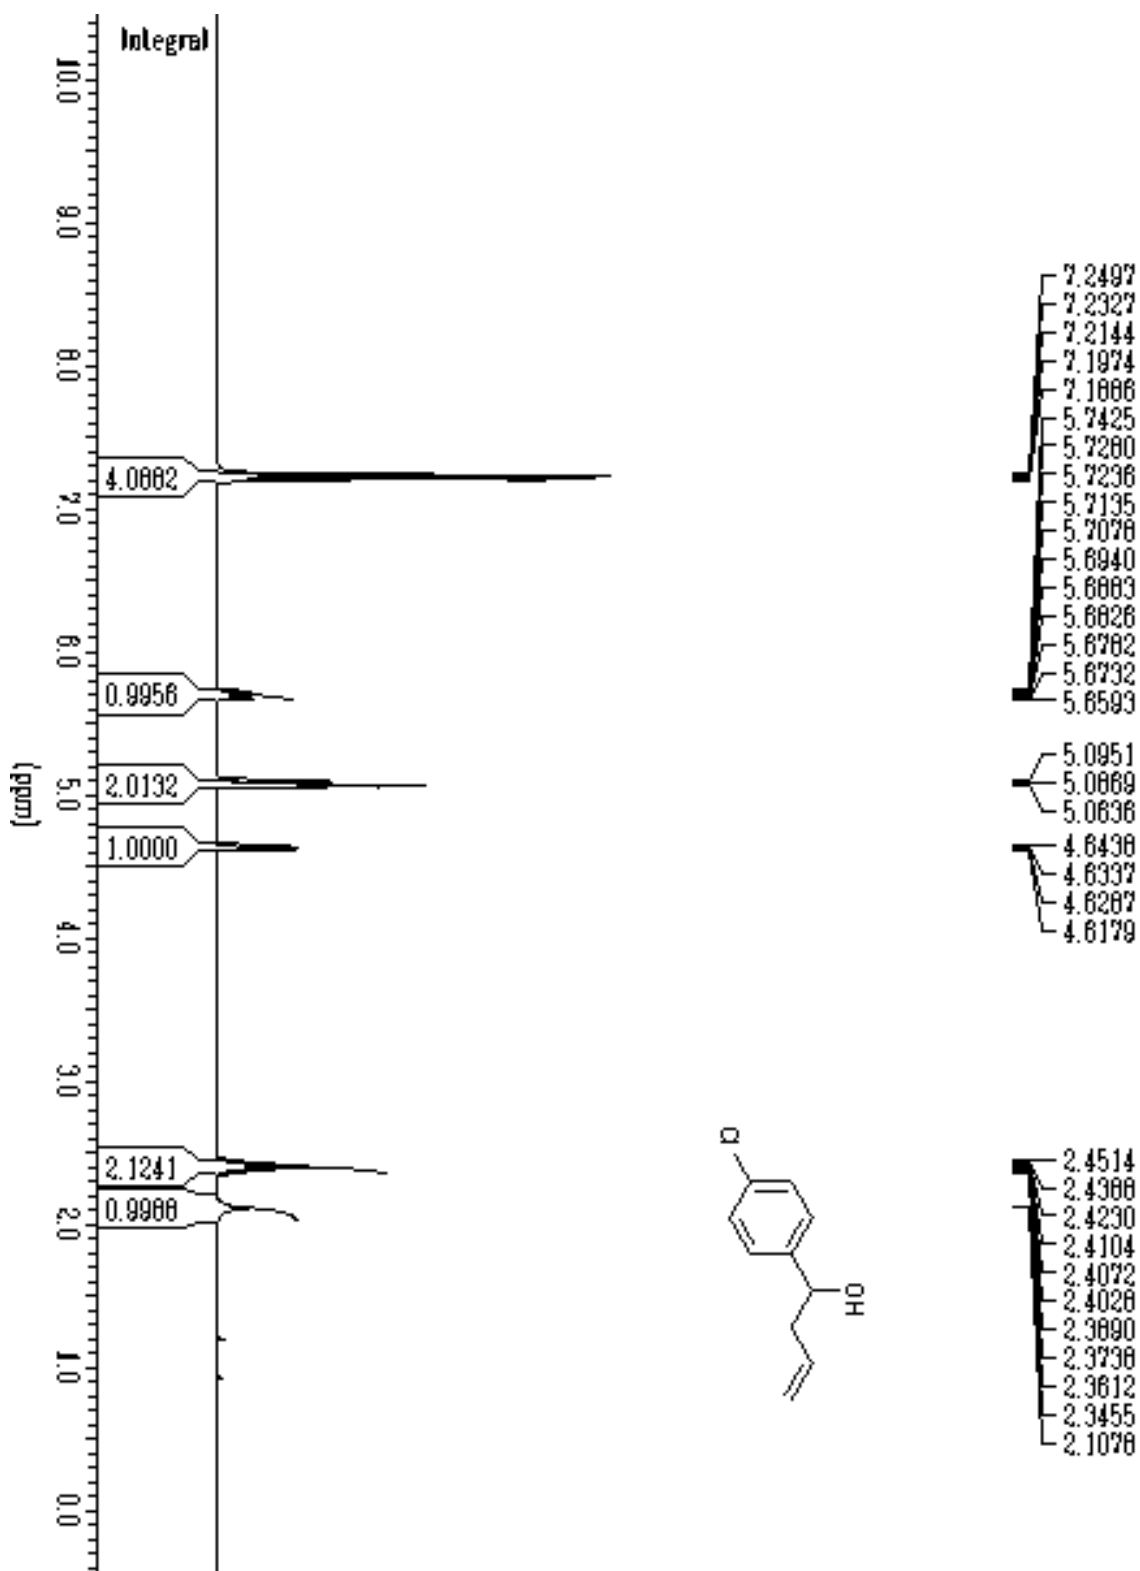

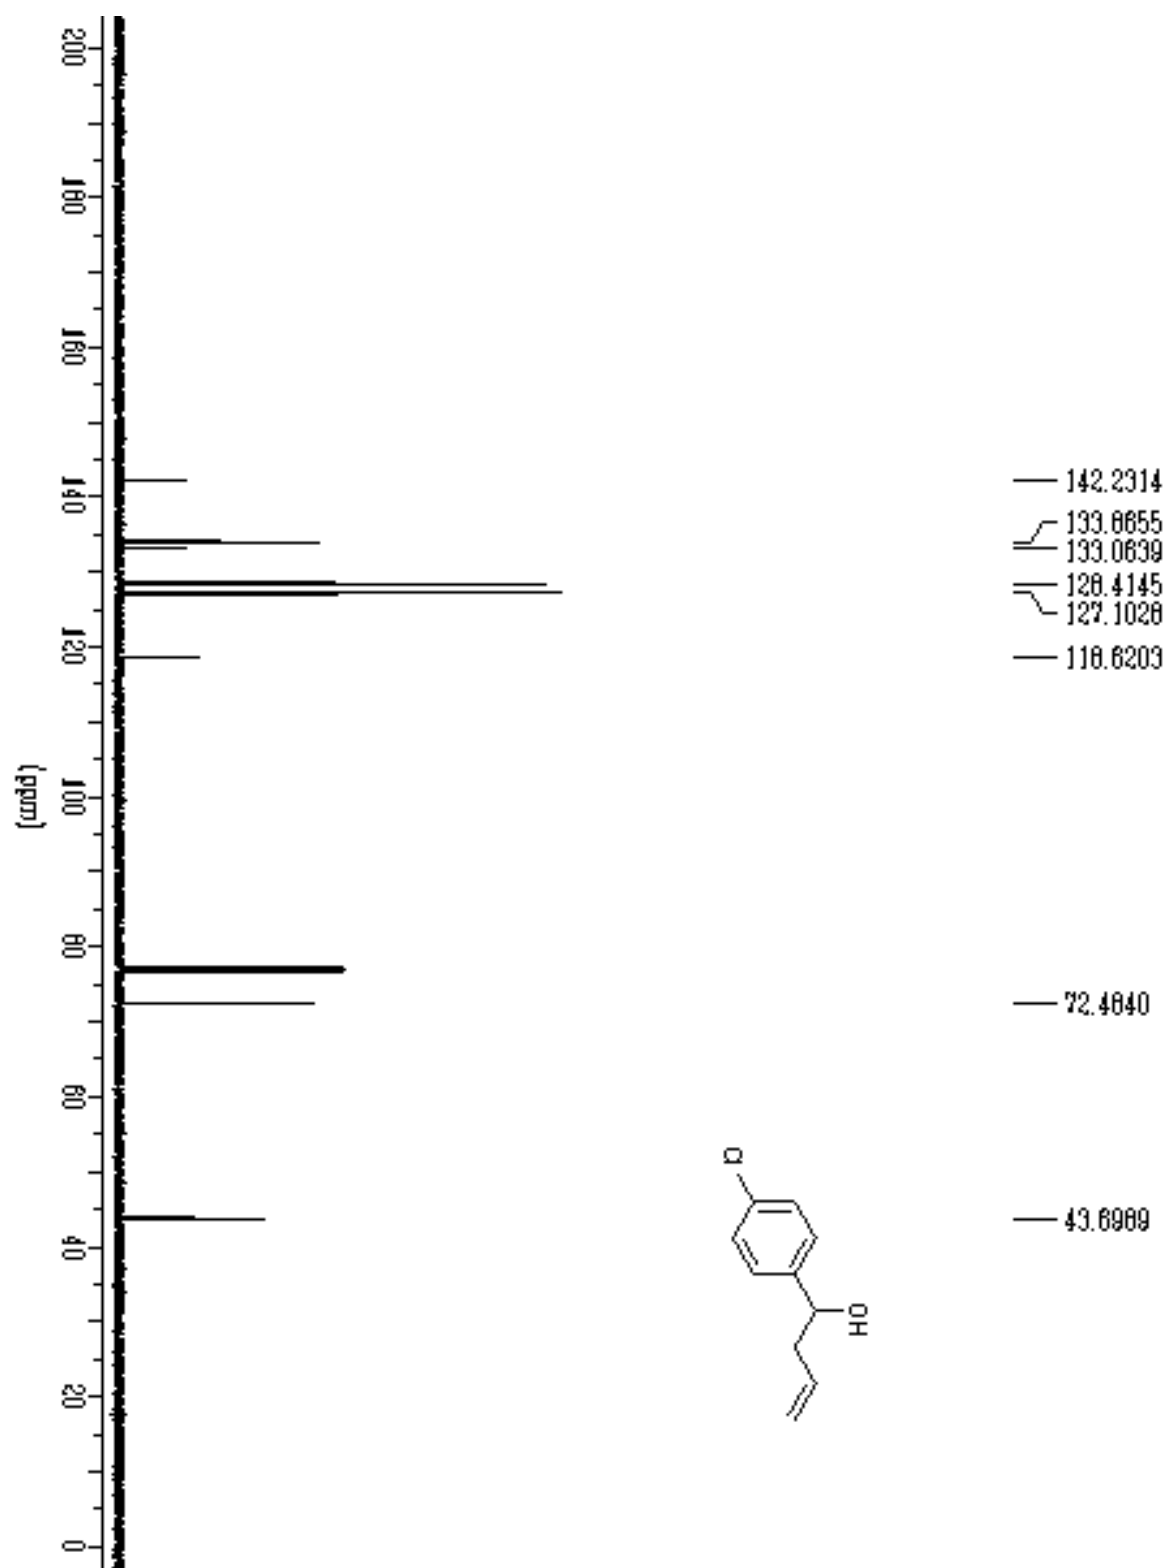

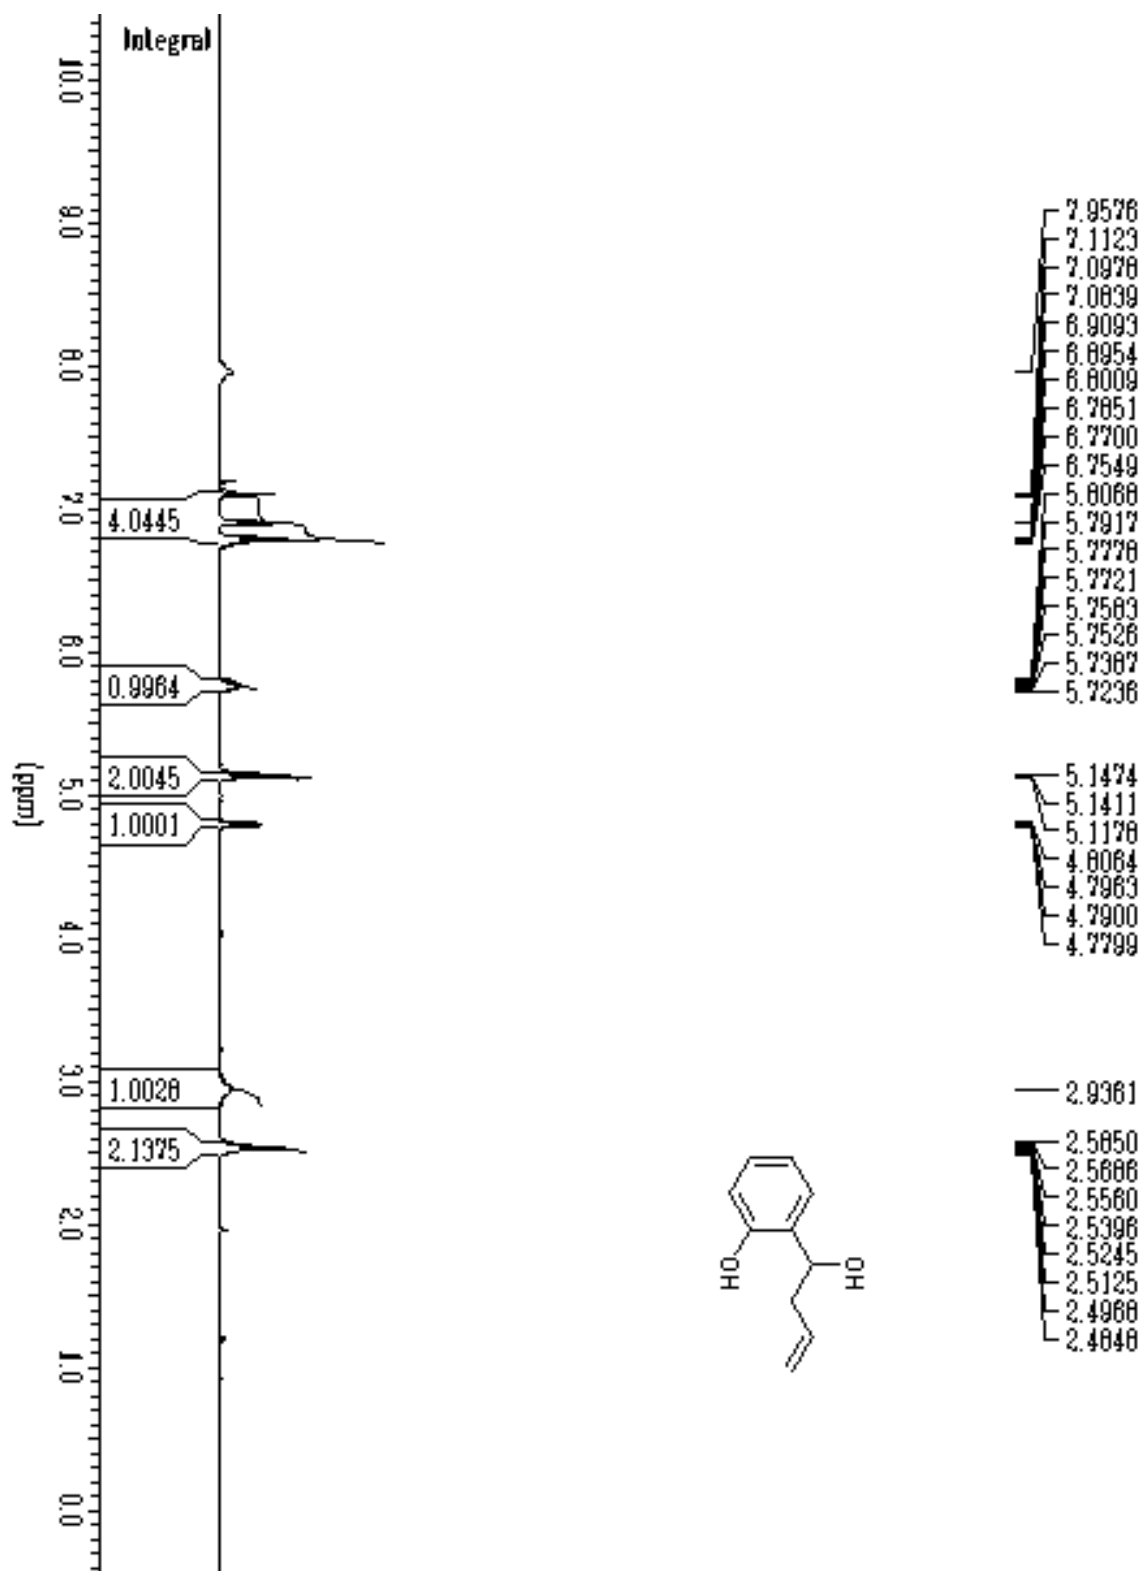

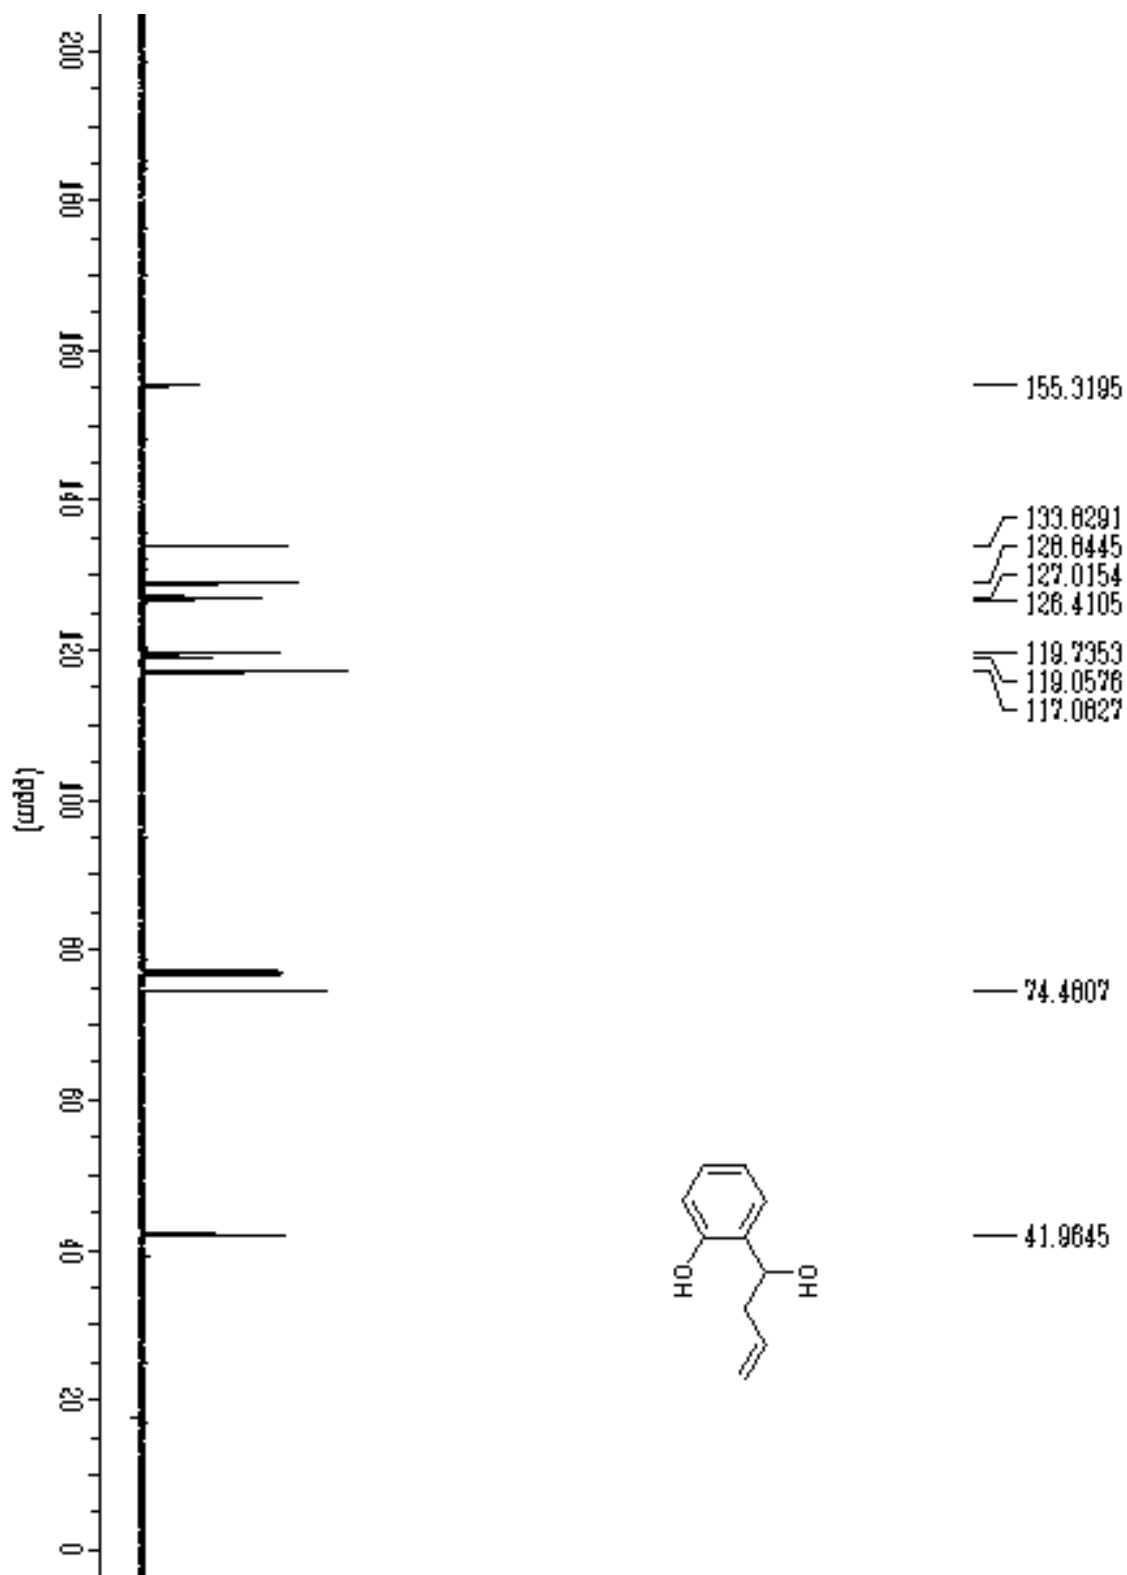



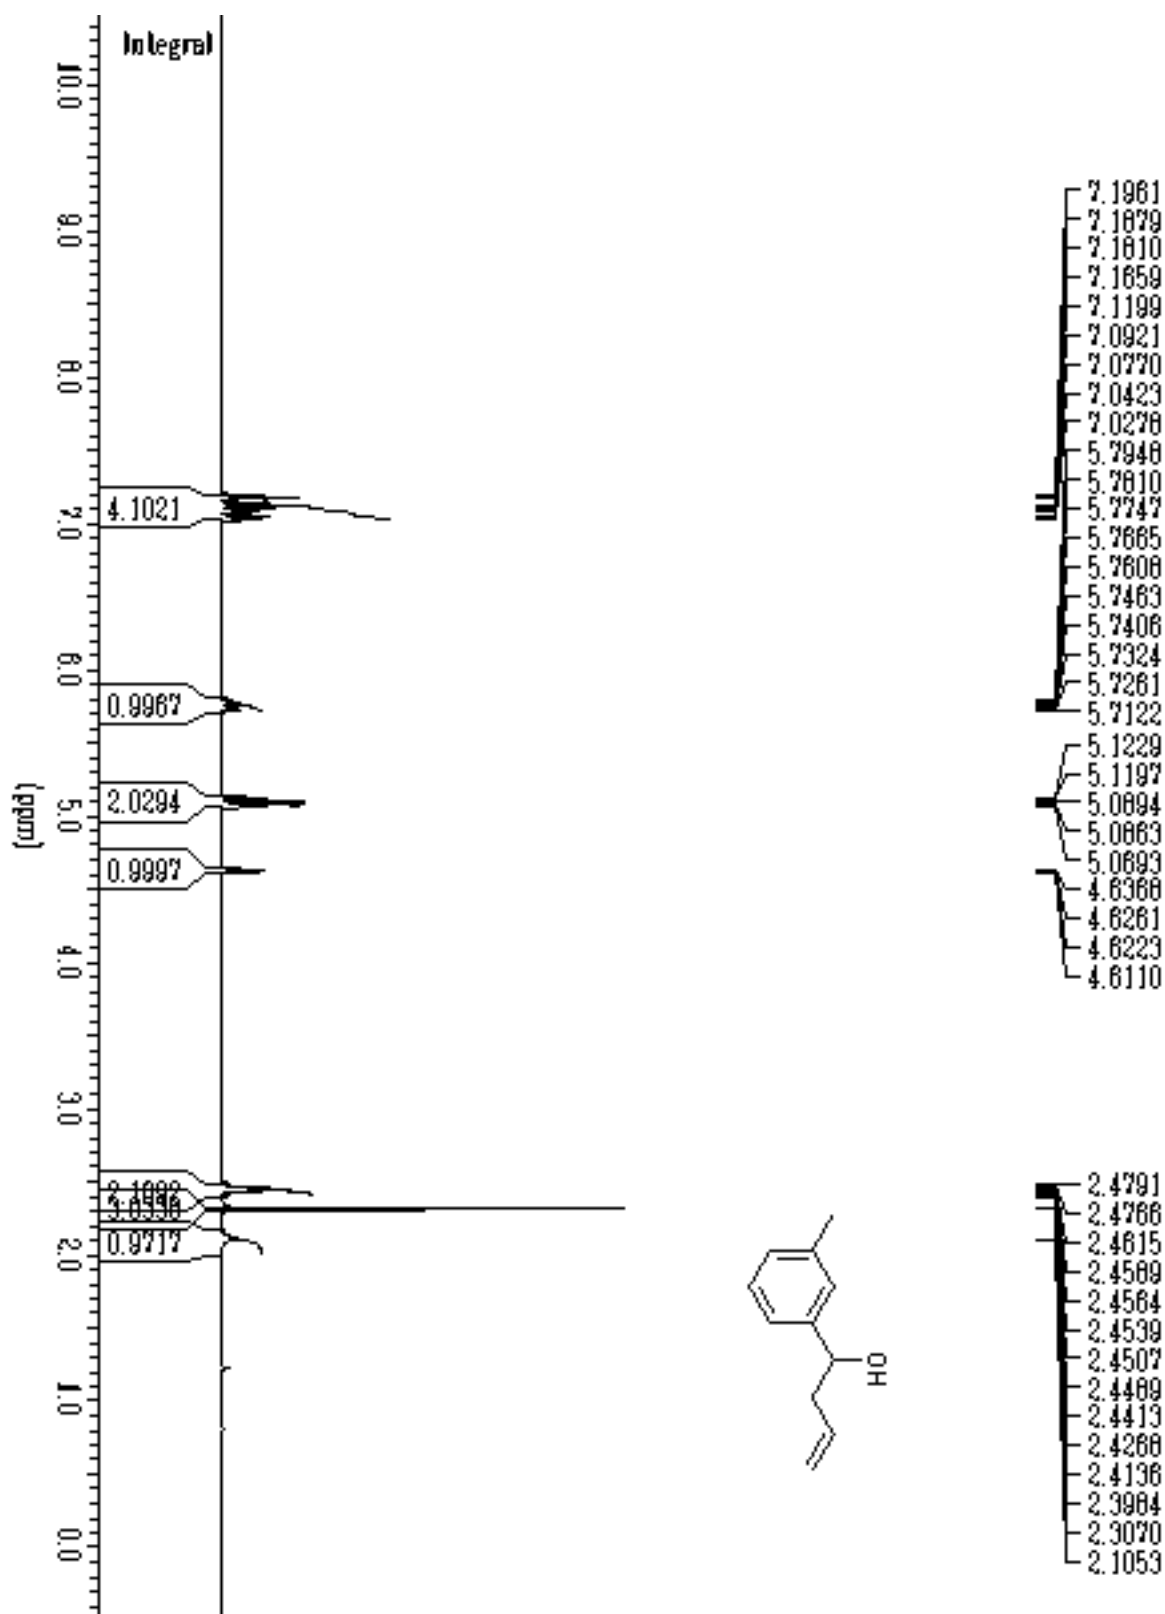

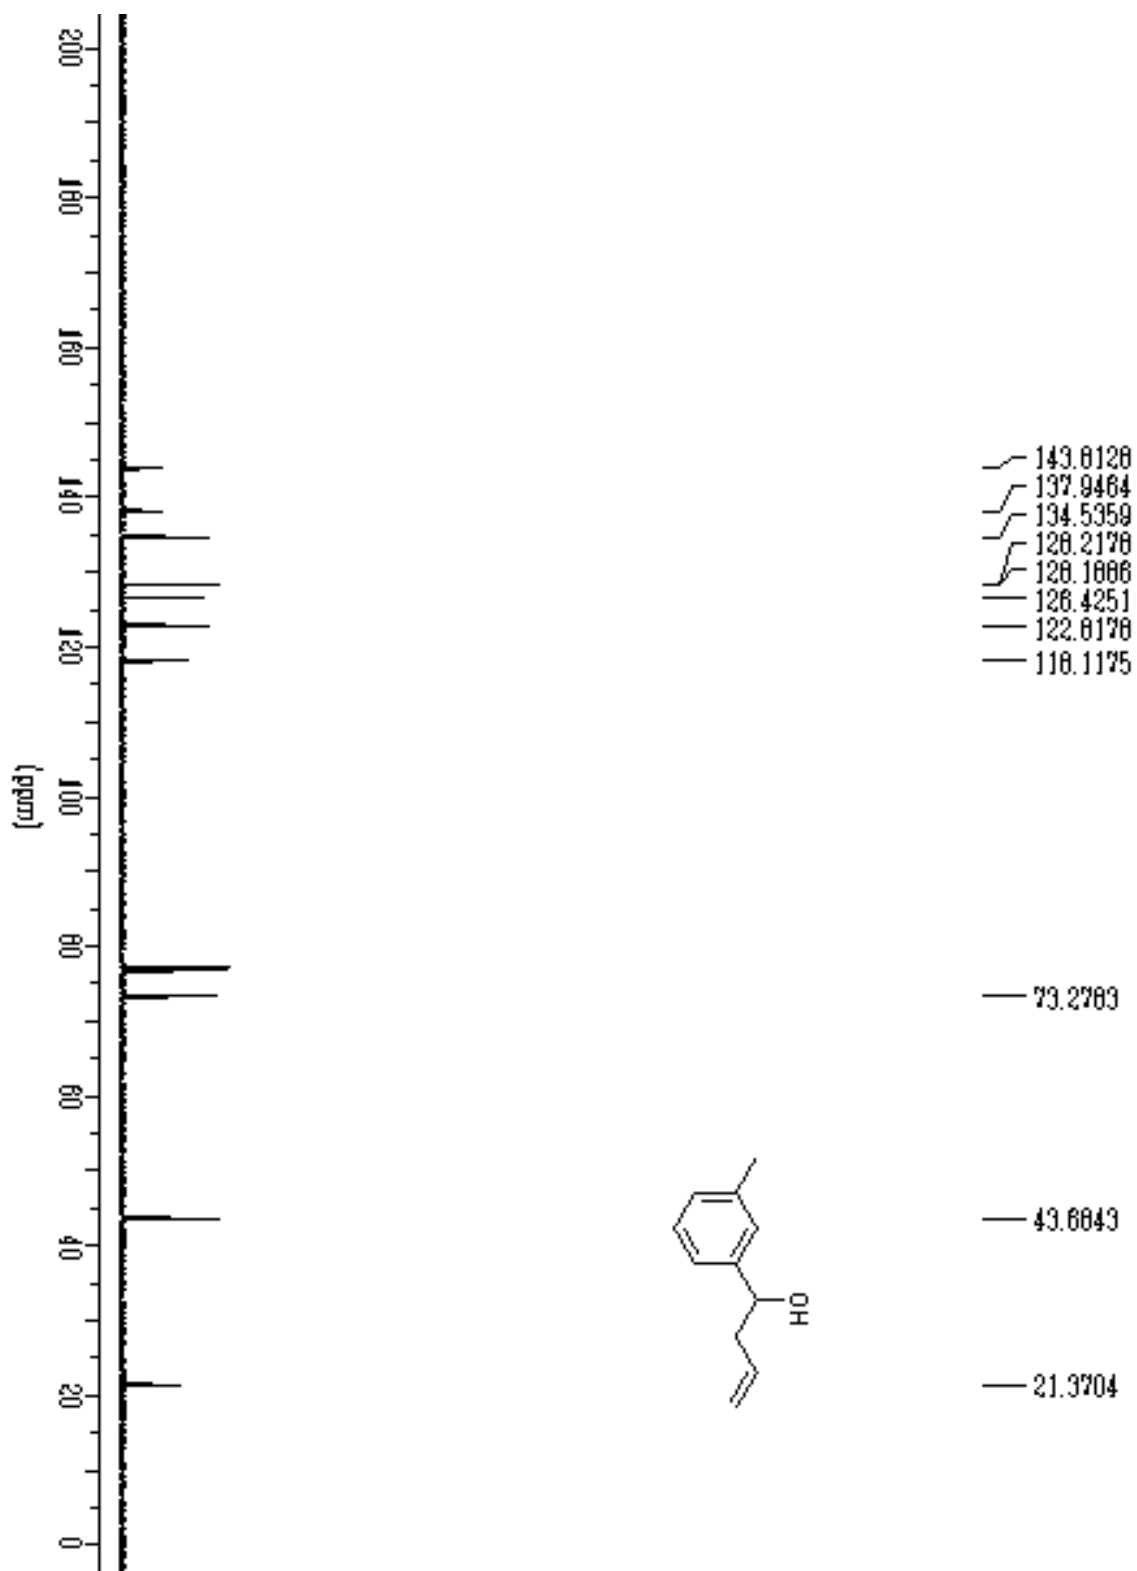

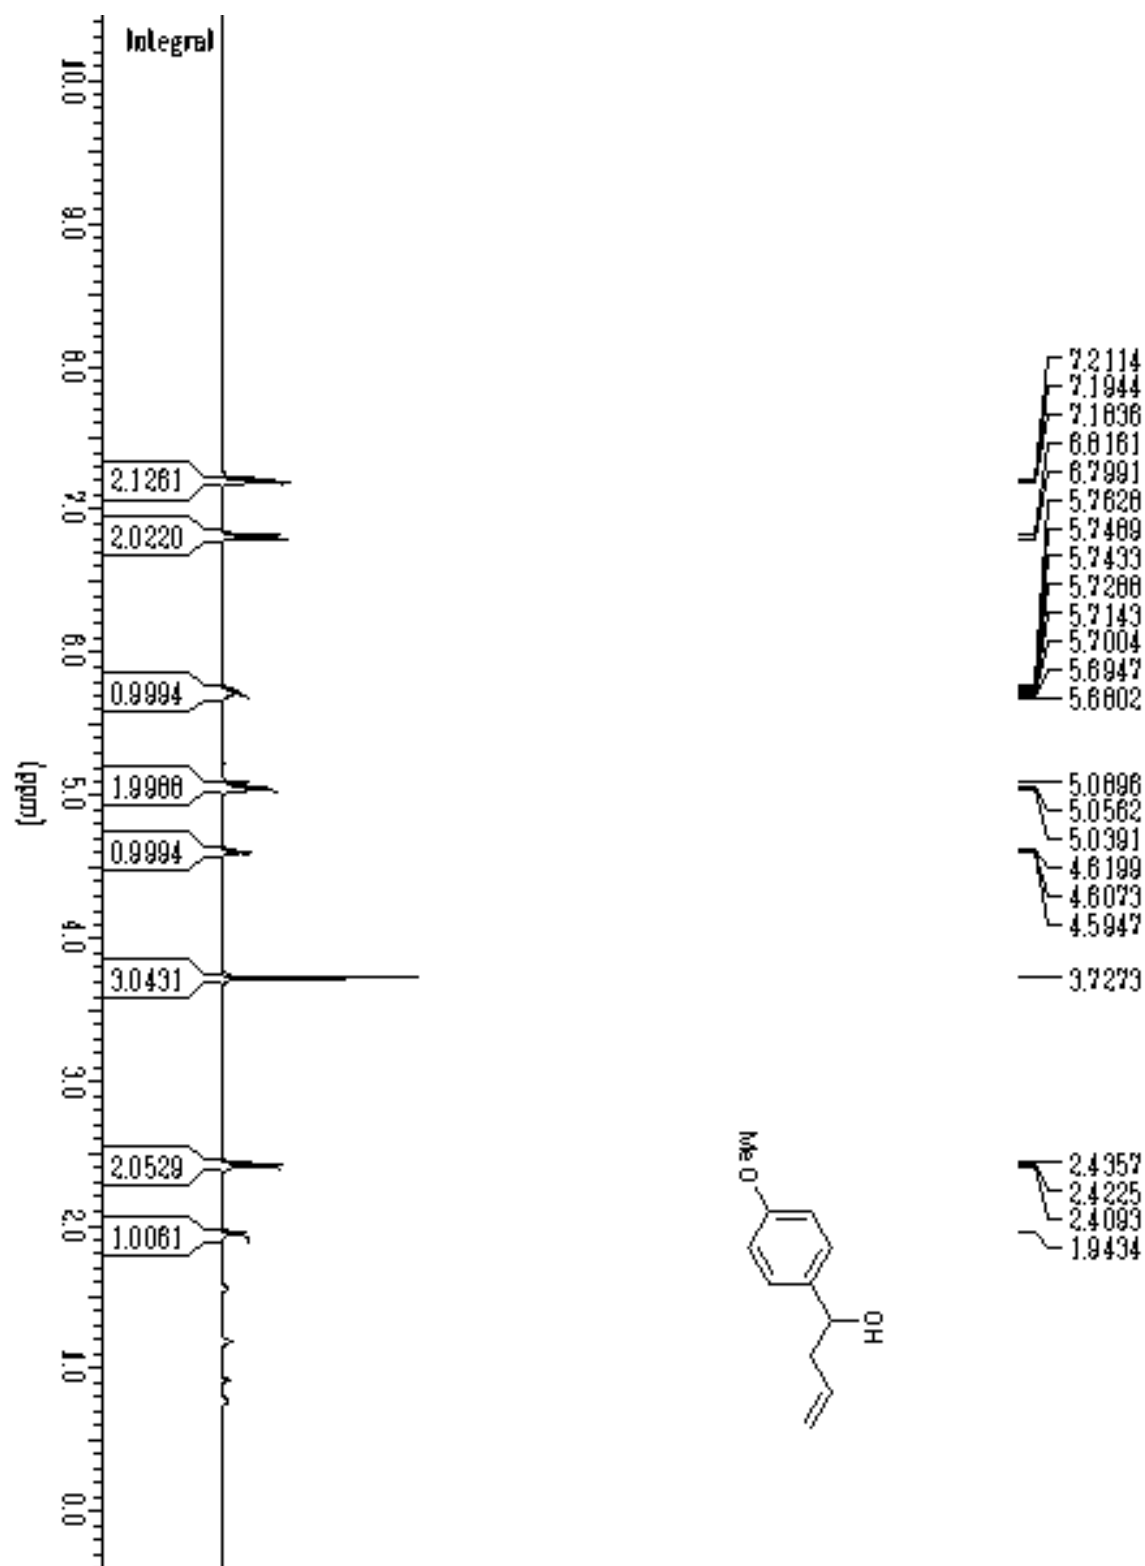

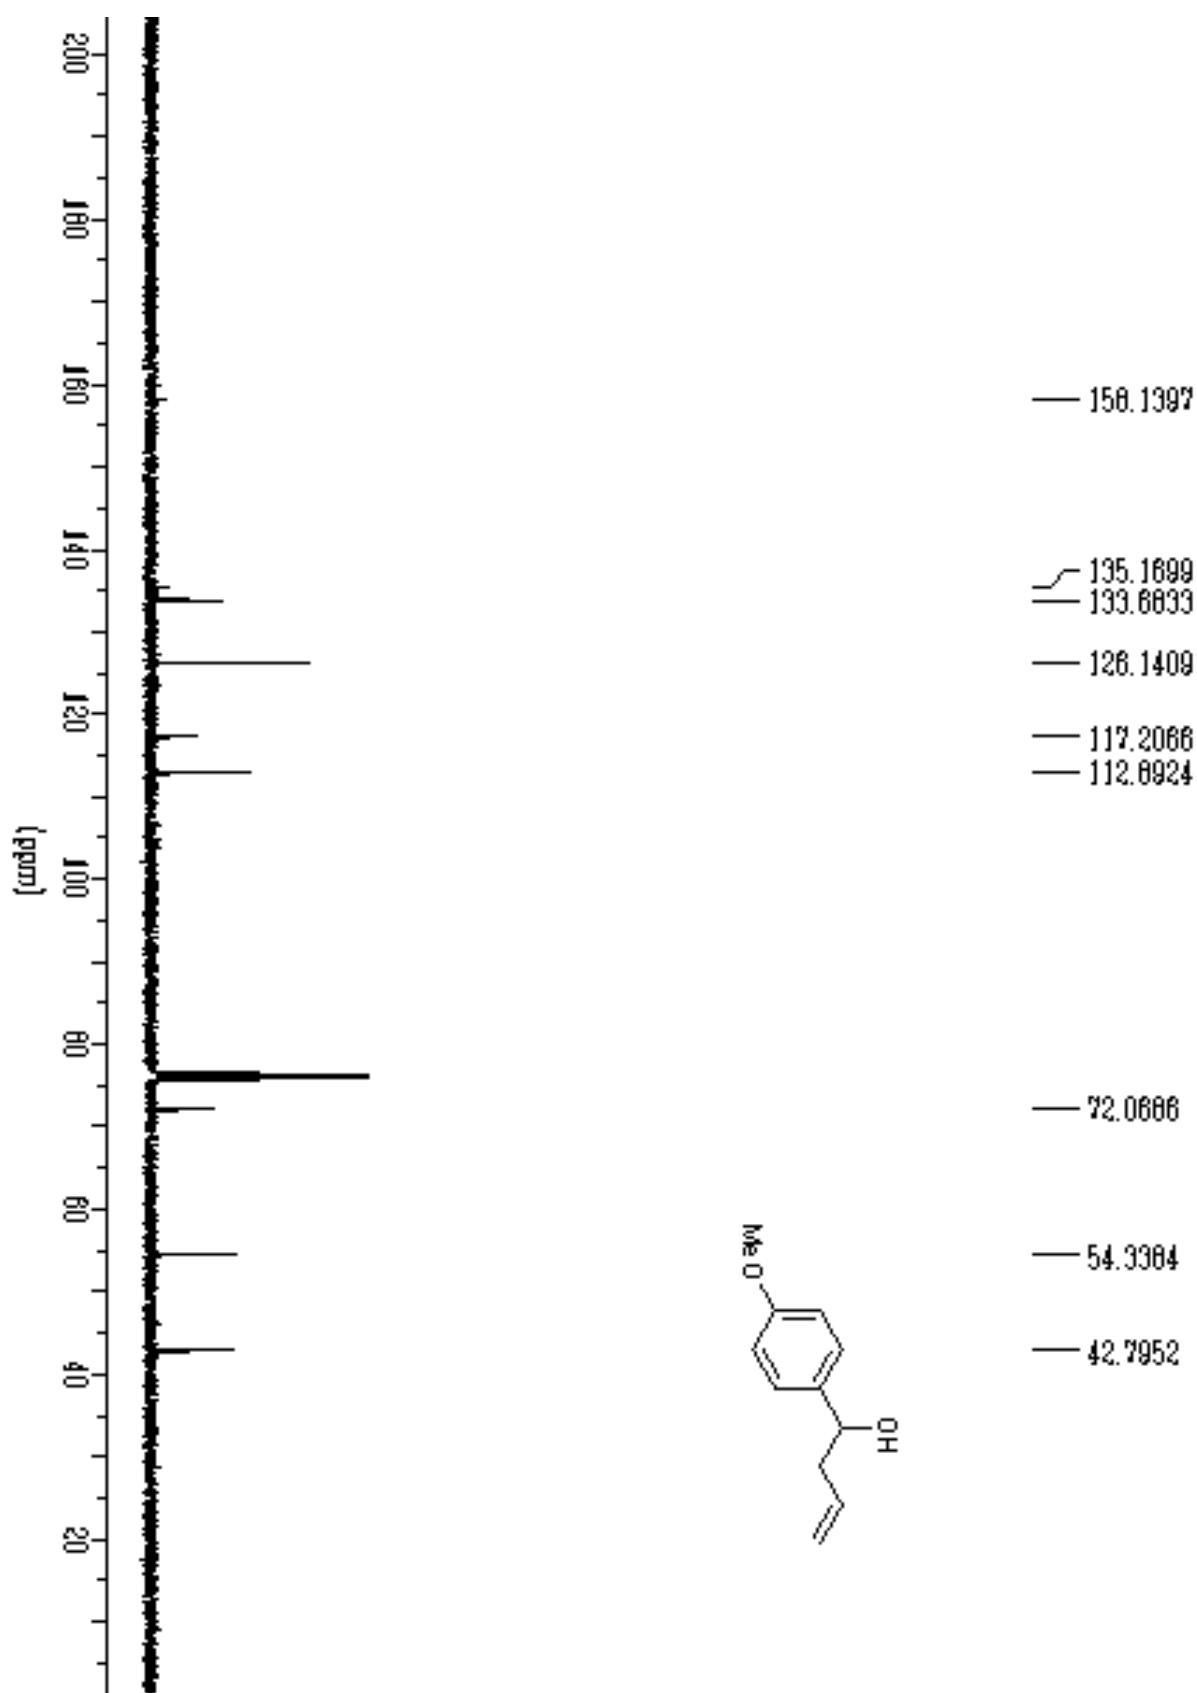

Supplement: b905553c.pdf [file b905553c.pdf]
